## Glucocorticoids Modulate the mTOR Pathway in the Hippocampus: Differential Effects Depending on Stress History

J. Annelies E. Polman,\* Richard G. Hunter,\* Niels Speksnijder, Jessica M.E. van den Oever, Oksana B. Korobko, Bruce S. McEwen, E. Ronald de Kloet, and Nicole A. Datson

Division of Medical Pharmacology (J.A.E.P., N.S., J.M.E.v.d.O., O.B.K., E.R.d.K., N.A.D.), Leiden/Amsterdam Center for Drug Research, Leiden University Medical Center, 2300 RA Leiden, The Netherlands; and Laboratory of Neuroendocrinology (R.G.H., B.S.M.), The Rockefeller University, New York, New York 10065

Glucocorticoid (GC) hormones, released by the adrenals in response to stress, are key regulators of neuronal plasticity. In the brain, the hippocampus is a major target of GC, with abundant expression of the GC receptor. GC differentially affect the hippocampal transcriptome and consequently neuronal plasticity in a subregion-specific manner, with consequences for hippocampal information flow and memory formation. Here, we show that GC directly affect the mammalian target of rapamycin (mTOR) signaling pathway, which plays a central role in translational control and has long-lasting effects on the plasticity of specific brain circuits. We demonstrate that regulators of the mTOR pathway, DNA damage-induced transcript (DDIT)4 and FK506-binding protein 51 are transcriptionally up-regulated by an acute GC challenge in the dentate gyrus (DG) subregion of the rat hippocampus, most likely via a GC-response element-driven mechanism. Furthermore, two other mTOR pathway members, the mTOR regulator DDIT4-like and the mTOR target DDIT3, are down-regulated by GC in the rat DG. Interestingly, the GC responsiveness of DDIT4 and DDIT3 was lost in animals with a recent history of chronic stress. Basal hippocampal mTOR protein levels were higher in animals exposed to chronic stress than in controls. Moreover, an acute GC challenge significantly reduced mTOR protein levels in the hippocampus of animals with a chronic stress history but not in unstressed controls. Based on these findings, we propose that direct regulation of the mTOR pathway by GC represents an important mechanism regulating neuronal plasticity in the rat DG, which changes after exposure to chronic stress. (*Endocrinology* 153: 4317–4327, 2012)

The hippocampus is a brain structure involved in cognitive processes and is a major target of glucocorticoid (GC) hormones, which are released by the adrenals in response to stress. Upon release, GC readily pass the blood-brain-barrier and target the GC receptor (GR), which is abundantly expressed throughout the brain and in particular in the hippocampus. GR is a ligand-inducible transcription factor and a member of the nuclear receptor family of transcription factors (1). Due to its relatively low ligand affinity, most GR activation occurs at the circadian

peak or during the stress response (2). Although non-genomic effects of GR exist (3), GC effects on function and morphology of hippocampal neurons are to a large extent caused by transcriptional regulation of a wide repertoire of genes that play a central role in plasticity, energy metabolism, response to oxidative stress, and survival of hippocampal neurons (4, 5).

GC are key regulators of neuronal plasticity and have profound effects on hippocampal function and viability. Hippocampal synaptic plasticity, a process fundamental

ISSN Print 0013-7227 ISSN Online 1945-7170  
Printed in U.S.A.

Copyright © 2012 by The Endocrine Society

doi: 10.1210/en.2012-1255 Received March 1, 2012. Accepted June 12, 2012.

First Published Online July 9, 2012

\* J.A.E.P. and R.G.H. contributed equally to this work.

Abbreviations: ADX, Adrenalectomy; CA, cornu ammonis; ChIP, chromatin immunoprecipitation; CORT, corticosterone; CRS, chronic restraint stress; DDIT, DNA damage-induced transcript; DDIT4L, DDIT4-like; DG, dentate gyrus; FKBP51, FK506-binding protein 51; GC, glucocorticoid; GR, GC receptor; GRE, GC response element; LTD, long-term depression; LTP, long-term potentiation; mTOR, mammalian target of rapamycin; O/N, overnight; PI, protease inhibitor; REDD, regulated in development and DNA damage responses; RT-qPCR, real-time quantitative PCR.

to hippocampus-dependent learning and memory, is clearly affected by acute stress and concomitant GR activation and persists for hours after stress exposure (6, 7). Acute stress and high concentrations of GC increase calcium current amplitude and impair long-term potentiation (LTP) in both hippocampal cornu ammonis (CA)1 and CA3 cell fields (8). Although the dentate gyrus (DG) region seems less sensitive to the effects of acute stress with respect to functional properties such as calcium current amplitude and  $\alpha$ -amino-3-hydroxy-5-methyl-4-isoxazole-propionic acid (AMPA) receptor-mediated synaptic responses (8, 9), acute stress decreases new cell proliferation rate and increases apoptosis in the rat DG (10).

Like acute stress, chronic stress also affects hippocampal structure and function. Repeated stress causes remodeling of dendrites in the CA3 region (4, 11–13). In the DG, chronic stress has effects on cell turnover of DG neurons and progenitor cells in the subgranular zone, where chronic stress suppresses both apoptosis and neurogenesis (4, 10, 14). After chronic stress exposure, synaptic excitation of DG cells may be enhanced when GC levels rise. This enhanced synaptic flow could contribute to enhanced excitation of projection areas of the DG, most notably the CA3 hippocampal region (15).

An important signaling pathway in the hippocampus is the mammalian target of rapamycin (mTOR) pathway, which plays a central role in translational control and long-lasting synaptic plasticity (16). The mTOR pathway integrates signals from nutrients, growth factors, and information on energy status to regulate many processes, including cell growth, cell proliferation, cell motility, and cell survival (17, 18). In neurons, the mTOR pathway modulates local translation of proteins at the synapse and therefore is critical for different forms of synaptic plasticity, including LTP and long-term depression (LTD) (19, 20). Dysregulation of this pathway is a common hallmark in a wide variety of brain disorders, including autism, brain tumors, tuberous sclerosis, and neurodegenerative disorders, such as Parkinson's, Alzheimer's, and Huntington's disease (21–26).

Although it is known that the mTOR pathway is subject to regulation by GC in the periphery (27–29), so far little is known whether this also is the case in the brain. Two recent studies showed an inhibitory effect of GC on mTOR signaling in rat hypothalamic organotypic cultures and mouse cortical primary cultures (30, 31), but to our knowledge, this has not been shown *in vivo* in the brain. In this study, we used an integrated genomics approach consisting of *in silico* predictions of GR binding sites, DNA microarrays, and chromatin immunoprecipitation (ChIP), to investigate whether the mTOR pathway is regulated by GC *in vivo* in the hip-

pocampus. Here, we present data demonstrating that key regulators of the mTOR pathway, DNA damage-induced transcript (DDIT)4 [also known as regulated in development and DNA damage responses (REDD)1], FK506-binding protein 51 (FKBP51), DDIT4-like (DDIT4L) [also known as REDD2], and mTOR target DDIT3 (also known as CCAAT-enhancer-binding proteins homologous protein 3 or CHOP3) are regulated by GC in the DG subregion of the hippocampus. Interestingly, the GC regulation of DDIT4 and DDIT3 transcription as well as hippocampal mTOR protein levels after an acute GC challenge are differentially affected in animals previously exposed to chronic stress compared with controls. Based on these findings, we propose that direct regulation of the mTOR pathway by GC represents an important mechanism underlying GC effects on neuroplasticity in the brain, with different outcomes depending on previous stress history.

## Materials and Methods

### Experimental groups and collection of tissue

Animal experiments were performed to measure effects on the mTOR pathway at multiple levels, including DNA binding and effects on mRNA and protein levels. Because in the temporal sequence of events DNA binding precedes effects on transcription, which ultimately translate into effects at the protein level, different time points were chosen depending on the parameter of interest. DNA binding was quantified at  $t = 1$  h, mRNA changes at  $t = 3$  h, and protein levels at  $t = 5$  h.

For microarray analysis, male Sprague Dawley rats of 70 d of age (Charles River, Kingston, NY) were either handled for 21 d (control) or subjected to chronic restraint stress (CRS) for 6 h a d during 21 d (32). On d 22, half of the rats received a challenge, which consisted of an injection with corticosterone (CORT) (sc 5 mg/kg, in propylene glycol), and were killed 3 h later. The other half of the rats (control and CRS) were not challenged. Therefore, these rats were left undisturbed and did not receive a vehicle injection to avoid eliciting a stress response. The unchallenged rats were killed at the same time point as the injected rats. This resulted in four experimental groups (all  $n = 6$ ) for the microarray analysis: 1) control, 2) control + CORT, 3) CRS, and 4) CRS + CORT. After decapitation, brains were rapidly dissected and snap frozen in isopentane (cooled in ethanol placed on pulverized dry ice) and stored at  $-80^\circ\text{C}$  for later use.

The experiment was repeated as described above ( $n = 8$  per group) to determine effects of CRS and CORT challenge on mTOR protein levels using Western blot analysis, with the difference that the rats were killed 5 h after the CORT challenge on d 22. Hippocampi were immediately removed from the brain and processed for Western blot analysis (see below).

In a separate experiment, body weight and relative thymus weight were determined in control and CRS animals as a bioassay reflecting CORT exposure over the 21-d period. A clear decrease in body weight gain and relative thymus weight was observed upon

CRS (Supplemental Fig. 1, published on The Endocrine Society's Journals Online web site at <http://endo.endojournals.org>). Animal care was conducted in accordance with the Rockefeller University Animal Care Committee.

For ChIP analysis, male Sprague Dawley rats of 70 d of age (Harlan, Horst, The Netherlands) were adrenalectomized (ADX) as described before to completely deplete endogenous CORT levels and ensure that there was no GR bound to the DNA (33). Three days after ADX, one group of animals received an ip injection with 3 mg/kg CORT-hydroxypropyl-cyclodextrin complex, whereas the other group was left undisturbed ( $n = 6$  per group). All animals were decapitated after 1 h for ChIP. Immediately after decapitation, the hippocampi were isolated and further processed for ChIP (see below). CORT levels in the blood 2 d after ADX and at the moment of decapitation were measured by RIA, showing that both the ADX operation was successful as well as a significant increase in CORT 3 h after injection (data not shown). Experiments were approved by the Local Committee for Animal Health, Ethics, and Research of the University of Leiden (Dier Experimenten Commissie nos. 06055 and 10044). Animal care was conducted in accordance with the European Commission Council Directive of November 1986 (86/609/EEC).

### Microarray analysis

CA3 and DG subregions were isolated by laser microdissection from coronal brain sections (8  $\mu$ m) containing the rostral rat hippocampus as previously described (34). RNA was isolated using TRIzol (Invitrogen, Carlsbad, CA), linearly amplified for two rounds, and hybridized to Rat Genome 230 2.0 Arrays (Affymetrix, Santa Clara, CA) containing 31,099 probe sets representing over 28,000 well-substantiated rat genes. Hybridizations were conducted at the Leiden Genome Technology Center (Leiden University), according to the manufacturer's recommendations (Affymetrix). MAS 5.0 normalization of microarray data was performed in BRB-Array Tools version 3.7.0, an integrated package for the visualization and statistical analysis of DNA microarray gene expression data that operates as an add-in to Microsoft Excel (35). Normalized data were subsequently subjected to statistical analysis using Linear Models for Microarray Data (36), a package for the R computing environment that allows multiple comparison of experimental groups. Differences in gene expression between groups were evaluated using two-way ANOVA with group and treatment as factors, followed by pairwise *post hoc* comparisons. Genes with  $P \leq 0.05$  were considered significant. An extensive list of mTOR pathway members was assembled based on literature and checked for representation on the Affymetrix Rat Genome 230 2.0 Array.

### Chromatin immunoprecipitation

Immediately after decapitation, the hippocampal tissue was chopped into pieces of approximately 1 mm and fixed in 1% formaldehyde for 15 min under continuous rotation. Cross-linking was stopped by adding 0.125 M glycine for 5 min. Subsequently, the tissue was washed three times with PBS and once with PBS containing protease inhibitors (PI). Pellets were snap frozen and stored at  $-80^{\circ}\text{C}$ .

Defrosted pellets were homogenized for  $2 \times 10$  sec in 0.5 ml of mild lysis buffer [10 mM Tris-HCl (pH 7.5), 10 mM NaCl, and 0.2% Nonidet P-40] supplemented with PI using the Bio-Gen

PRO200 homogenizer. After centrifugation, the pellets were dissolved in 0.6 ml of PI-containing radioimmunoprecipitation assay buffer [0.1% sodium dodecyl sulfate, 1% deoxycholate, 150 mM NaCl, 10 mM Tris (pH 8.0), 2 mM EDTA, 1 mM NaVO<sub>3</sub>, 1% Nonidet P-40,  $\beta$ -glycerolphosphate, and Na-butyrate] and incubated on ice for 30 min. Subsequently, the chromatin was sheared (20 pulses of 30 sec., 200 W; Bioruptor, Diagenode, Liège, Belgium), resulting in chromatin fragments of 100–500 bp, and stored at  $-80^{\circ}\text{C}$ .

Sephacrose A beads (GE Healthcare, Princeton, NJ) were blocked with 1 mg/ml bovine serum albumin (Westburg, Leusden, The Netherlands) and 0.2 mg/ml fish sperm (Roche Applied Science, Basel, Switzerland) for 1 h at 4  $^{\circ}\text{C}$ . Two ChIPs each were performed on the same batch of hippocampal chromatin derived from three different animals. Per ChIP, the chromatin was precleared by incubation with blocked beads for 1 h. After preclearing, an input sample was taken to control for the amount of DNA used as input for the ChIP procedure. The remaining sample was divided into two samples, each incubated overnight (O/N) at 4  $^{\circ}\text{C}$  under continuous rotation with either 6  $\mu$ g of GR-specific H300 or normal rabbit IgG (Santa Cruz Biotechnology, Inc., Santa Cruz, CA). Subsequently, the antibody-bound DNA fragments were isolated by incubating the samples with blocked protein A beads for 1 h at 4  $^{\circ}\text{C}$ . The beads were washed five times in 1 ml of washing buffer (1 $\times$  low salt, 1 $\times$  high salt, 1 $\times$  LiCl, and 2 $\times$  Tris-EDTA), followed by incubation with 0.25 ml of elution buffer (0.1 M NaHCO<sub>3</sub> and 1% sodium dodecyl sulfate) for 15 min (room temperature, continuous rotation) to isolate the DNA-protein complexes. To reverse cross-link the DNA-protein interactions, the samples were incubated O/N at 65  $^{\circ}\text{C}$  with 0.37 M NaCl. RNase treatment (0.5  $\mu$ g/250  $\mu$ l) was performed for 1 h at 37  $^{\circ}\text{C}$  followed by purification of DNA fragments on Nucleospin columns (Macherey-Nagel, Düren, Germany). The immunoprecipitated samples were eluted in 50  $\mu$ l of elution buffer.

### Western blot analysis

Hippocampal tissue was homogenized in radioimmunoprecipitation assay buffer with PI (04693124001; Roche Applied Science). Total protein concentration was measured by bicinchoninic acid assay according to the manufacturer's protocol (no. 23225, BCA Assay kit; Thermo Scientific, Rockford, IL). Electrophoresis of 20  $\mu$ g of protein per sample was performed on a precast 4–20% gradient gel (no. 456-1096; Bio-Rad Laboratories, Inc., Hercules, CA) and transferred O/N at 4  $^{\circ}\text{C}$  to Immobilon-P Transfer membrane (Millipore Corp., Billerica, MA). Primary antibody for mTOR (no. 2972; Cell Signaling Technology, Beverly, MA) was diluted 1:5000 and incubated O/N at 4  $^{\circ}\text{C}$ . Secondary antibody (goat antirabbit IgG horseradish peroxidase, no. 2054; Santa Cruz Biotechnology, Inc.) was incubated for 1 h at room temperature. Blots were exposed to ECL Hyperfilm (Amersham Biosciences, Buckinghamshire, UK) for 30 sec and scanned using an Epson V350 photo scanner (Epson, Long Beach, CA). Protein levels were quantified using ImageJ version 1.42. Signals were normalized against  $\alpha$ -tubulin. Two-way ANOVA with group and treatment as factors was used to determine whether there were any significant differences, followed by pairwise *post hoc* comparisons. Significance was accepted at  $P \leq 0.05$ .

**TABLE 1.** CORT regulation of the mTOR-associated transcripts

| Probe set ID | Gene symbol   | Gene title                             | ANOVA <i>P</i> value | Control + CORT |                | CRS + CORT |                |
|--------------|---------------|----------------------------------------|----------------------|----------------|----------------|------------|----------------|
|              |               |                                        |                      | FC             | <i>P</i> value | FC         | <i>P</i> value |
| 1369590_a_at | <i>Ddit3</i>  | DNA damage-inducible transcript 3      | 5.5E-03              | 0.6            | 2.2E-03        | NS         | NS             |
| 1368025_at   | <i>Ddit4</i>  | DNA damage-inducible transcript 4      | NS                   | 1.9            | 3.0E-02        | NS         | NS             |
| 1368013_at   | <i>Ddit4l</i> | DNA damage-inducible transcript 4 like | 1.9E-08              | 0.3            | 1.8E-07        | 0.4        | 8.4E-06        |
| 1380611_at   | <i>Fkbp5</i>  | FK506-binding protein 5                | 8.6E-06              | 2.0            | 1.3E-04        | 2.0        | 1.7E-04        |
| 1388901_at   | <i>Fkbp5</i>  | FK506-binding protein 5                | 8.0E-11              | 2.0            | 5.0E-09        | 2.0        | 1.4E-08        |

CORT regulation of the mTOR-associated transcripts DDIT4, FKBP51, DDIT4L, and DDIT3 is indicated in control animals (*left*) and in animals with a recent history of CRS (*right*). The fold change (FC) is shown, in which numbers above 1 indicate an up-regulation and below 1 a down-regulation by acute CORT.  $P > 0.05$  is considered not to be significant (NS).

### **In silico GC response element (GRE) prediction**

GenSig, an *in silico* screening method that uses a position weight matrix based on 44 published GREs, was used to identify evolutionary conserved GREs in the coding regions and a region 50 kb up- and downstream of the DDIT3 and DDIT4L genes (35). For DDIT4 and FKBP51, we had previously identified GREs and shown that GR binds to these sequences *in vivo* in the hippocampus (35).

### **Real-time quantitative PCR (RT-qPCR)**

RT-qPCR was performed to validate the microarray results for the selected mTOR signaling genes. For mRNA analysis, cDNA was synthesized from the same experimental RNA samples that were used for microarray analysis, using the iScript cDNA synthesis kit (Bio-Rad Laboratories, Inc.), according to manufacturer's instructions. PCR was conducted using the capillary-based LightCycler thermocycler and LightCycler FastStart DNA Master<sup>PLUS</sup> SYBR Green I kit (Roche Applied Science) according to manufacturer's instructions. All PCR reactions on cDNA were performed in duplo, and obtained threshold cycle values were all between 12 (Tubulin beta-2A chain) and 19–25 (mTOR signaling genes). The standard curve method was used to quantify the expression differences (36). cDNA values were normalized against *Tubb2a* expression levels and analyzed with GraphPad Prism 5 (GraphPad Software, Inc., San Diego, CA). Two-way ANOVA with group and treatment as factors was used in combination with *post hoc* testing to assess significant differential expression of GC-responsive genes. Significance was accepted at  $P < 0.05$ .

GR binding to predicted evolutionary conserved GREs in the vicinity of DDIT3, DDIT4, DDIT4L, and FKBP51 was validated using RT-qPCR on immunoprecipitated chromatin. All threshold cycle values ranged from 25 to 32. The ChIP PCR signal was normalized by subtracting the amount of nonspecific binding of the IgG antibody in the same sample. A further normalization for background noise was performed by subtracting the signal obtained at a nonbound GR region (exon 2 of the myoglobin gene). Metallothionein 2A, which has two well-documented GREs (37), served as a positive control for the ChIP. Control genes metallothionein 2A and myoglobin were measured twice by RT-qPCR in both ChIPs. The hypothesized GREs were measured once per ChIP. Normalized data were analyzed with GraphPad Prism 5. An unpaired two-tailed *t* test was used to assess significant GR binding. Significance was accepted at a  $P < 0.05$ .

The primer sequences for microarray and ChIP validation are listed in Supplemental Table 1.

## **Results**

### **GC affect the expression of mTOR regulators in the hippocampus**

Microarray analysis of mRNA expression in the rat hippocampal DG revealed differential expression of several mTOR regulators (FKBP51, DDIT4, and DDIT4L) and the mTOR target DDIT3 3 h after a CORT injection (Table 1). Both DDIT4 and FKBP51 were significantly up-regulated in the DG, whereas DDIT3 and DDIT4L were down-regulated. RT-qPCR confirmed the subregional differences in GC responsiveness of three out of four mTOR-associated transcripts (Fig. 1).

According to the microarray analysis, none of these mTOR regulators were significantly affected by CORT in the CA3 region of the hippocampus at the applied threshold of significance. However, according to RT-qPCR, DDIT3 was also GC responsive in CA3 ( $P = 0.026$ ), albeit to a lesser extent than in the DG.

mRNA expression of mTOR itself and of other mTOR regulators such as v-akt thymoma viral proto-oncogene 1, tuberous sclerosis protein 1 and 2, regulatory associated protein of mTOR, rapamycin-insensitive companion of mTOR, and phosphatidylinositol 3 kinase were not differentially expressed in either the DG or the CA3 subregion of the hippocampus according to microarray analysis. A total of four other mTOR pathway members were expressed at significantly different levels between the groups according to ANOVA, of which two were differentially expressed in response to GC challenge both in control and in CRS animals: ribosomal protein S6 kinase polypeptide 2 and insulin receptor (Supplemental Table 2).

### **FKBP51 and DDIT4 are primary targets of the GR in rat hippocampus**

Using a position weight matrix based on 44 published GREs, we previously identified and confirmed GR binding to three evolutionary conserved GREs in the FKBP51 gene and a GRE 20 kb upstream of DDIT4 (Supplemental Table



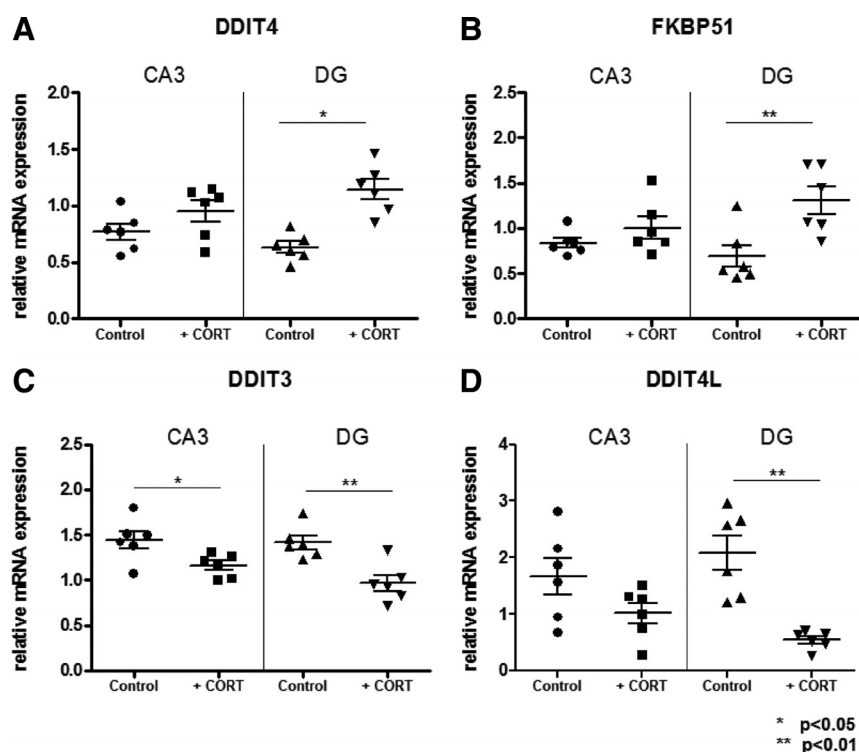

**FIG. 1.** RT-qPCR validation of expression levels in control animals before and after GC challenge for DDIT4 (A), FKBP51 (B), DDIT3 (C), and DDIT4L (D). RT-qPCR expression values were normalized against TUBB2a. Each point in the graph represents the expression of one animal. Asterisks indicate statistical significance: \*,  $P < 0.05$ ; \*\*,  $P < 0.01$ .

3) (35). Here, we replicated this finding in an independent experiment and confirmed GR binding to FKBP51\_1 (one of the three GREs for FKBP51 that we selected) and the GRE near DDIT4 (Fig. 2). Based on the GR binding to the GREs and their CORT-induced up-regulation, we conclude that FKBP51 and DDIT4 are primary targets of GR *in vivo* in the rat hippocampus and are most likely regulated by the transactivation mode of action of GR induced by GR-GRE interaction (37).

We used the same approach to screen for GREs in the vicinity of DDIT3 and DDIT4L, resulting in the identification of evolutionary conserved GRE-like sequences at

in the CRS rats (data not shown).

### Hippocampal mTOR protein levels are differentially affected by acute GR activation depending on previous stress history

Based on the observation that in CRS animals, the GC regulation of DDIT4 and DDIT3 in the DG was lost, we were curious to determine the overall effect this would have on mTOR protein levels. Therefore, we quantified basal mTOR protein levels and levels 5 h after GR activation by an acute GC injection in control and CRS rats (Fig. 4). Data were subjected to a two-way ANOVA with the factors group: control and CRS treatment, no treatment, and CORT. In addition, a *post hoc* test was applied to identify statistical significance between the four conditions. CORT had a significant effect on hippocampal mTOR protein levels [main effect of treatment,  $F(1,28) 4.200$ ;  $P = 0.050$ ]. In addition, there was a significant group-treatment interaction [ $F(1,28) 11.667$ ;  $P = 0.002$ ], indicating that the CORT challenge had significantly different effects on hippocampal mTOR protein levels in

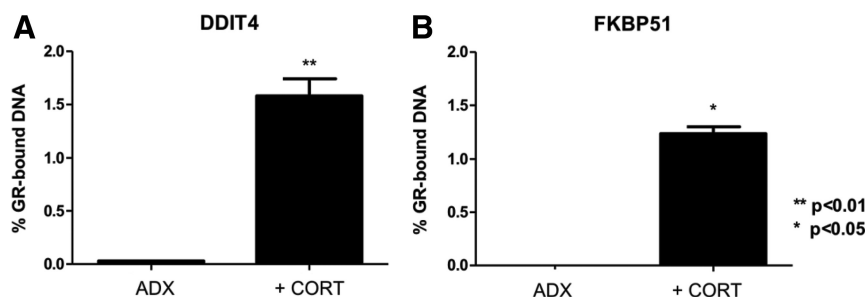

**FIG. 2.** GR binding to the *in silico* predicted GREs in total hippocampus at 60 min after an ip injection of 3 mg/kg CORT. GR binding is shown to the GRE associated with (A) DDIT4 and (B) FKBP51. The y-axis shows the percentage of input DNA that was bound by the GR. Columns represent average binding of two independent ChIP experiments each containing brain tissue of three different animals. The error bars equal SEM. Asterisks indicate statistical significance: \*,  $P < 0.05$ ; \*\*,  $P < 0.01$ .

2586 bp (DDIT3) and 2199 bp (DDIT4L) downstream of the transcription start site of both genes (Supplemental Table 3). However, we did not find GR binding to these predicted GREs associated with DDIT3 and DDIT4L under the given conditions.

### GC effects on the mTOR pathway are modulated by previous chronic stress exposure

Because chronic stress is known to affect hippocampal synaptic plasticity, we were interested whether having experienced chronic stress shortly before receiving a CORT challenge would affect the pattern of GC regulation of the mTOR regulators and target. Interestingly, in animals with a previous history of CRS, the GC regulation of DDIT4 and DDIT3 in the DG was lost, whereas that of FKBP51 and DDIT4L was maintained (Table 1 and Fig. 3). According to the microarray data, no GC regulation of any of the mTOR-associated genes was observed in the CA3 region

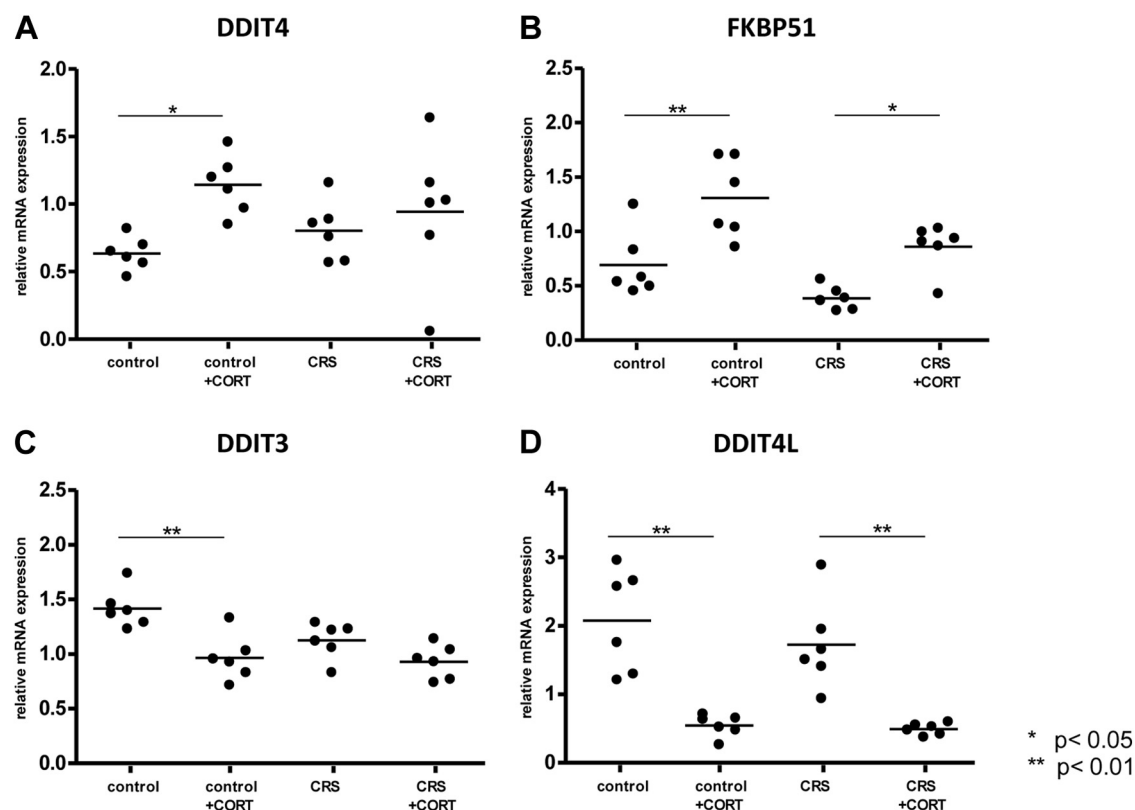

**FIG. 3.** RT-qPCR indicating expression levels of DDIT4 (A), FKBP51 (B), DDIT3 (C), and DDIT4L (D) with and without an acute GC challenge in control animals and animals with a previous history of stress. The GC responsiveness of DDIT3 and DDIT4 is lost in animals previously exposed to chronic stress. RT-qPCR expression values were normalized against TUBB2a. Each point in the graph represents the expression of one animal. Asterisks indicate statistical significance: \*,  $P < 0.05$ ; \*\*,  $P < 0.01$ .

control and CRS groups. In other words, giving an acute GC challenge had no effect on mTOR protein levels in the hippocampus of control animals ( $P = 0.559$ ). However, in animals with a previous history of stress, an acute GC challenge resulted in a significant reduction in hippocampal

mTOR protein ( $P = 0.004$ ) (Fig. 4). Without treatment, the stress group had significantly higher mTOR levels than the control group ( $P = 0.032$ ).

## Discussion

Here, we show that regulators of the mTOR pathway are targets of GC stress hormones in the hippocampal DG and to a lesser extent in CA3 pyramidal neurons. Furthermore, we demonstrate that the action of GC on the expression of mTOR pathway members as well as on hippocampal mTOR protein levels is context dependent and is highly sensitive to chronic stress.

### GC as regulators of mTOR signaling in the brain

The mTOR pathway is a dynamically regulated system and has many upstream regulators that confer information from the extracellular environment to the cell. So far, not much is known on the extracellular signals that lead to mTOR activation in the brain. Several neuronal surface receptors, including N-methyl-D-aspartate receptors, dopaminergic, and metabotropic glutamate receptors as well as brain-derived neurotrophic factor, implicated in induc-

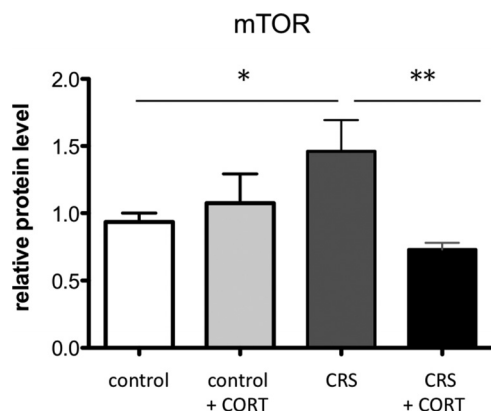

**FIG. 4.** mTOR protein levels in the hippocampus measured by Western blotting. mTOR protein levels were normalized against  $\alpha$ -tubulin expression levels. Two-way ANOVA indicated that CORT had a significant effect on mTOR  $F(1,28) 4.200$ ;  $P = 0.050$ . In addition, there was a strong group-treatment interaction [ $F(1,28) 11.667$ ;  $P = 0.002$ ], indicating that CORT has significantly different effects on hippocampal mTOR protein levels in control and stress animals. Asterisks indicate statistical significance: \*,  $P < 0.05$ ; \*\*,  $P < 0.01$ .

tion and maintenance of LTP and LTD, are known to influence mTOR function upon activation (16). Although GC have been shown to repress mTOR signaling in several cell types, including lymphoid cells, skeletal muscle, hypothalamic organotypic cultures, and primary cortical neurons, to our knowledge, this has not been shown before *in vivo* in the brain (29–31, 38).

One of the proteins that is regulated by GC in the hippocampus is DDIT4 (or REDD1), which is known to inhibit mTOR activity, resulting in an increase in apoptosis in mouse embryonic fibroblasts (39, 40). DDIT4L (or REDD2), which is approximately 50% homologous to DDIT4, has also been found to inhibit mTOR signaling after GC stimulation in human embryonic kidney 293 and Chinese hamster ovary cells (39). This indicates that DDIT4 and DDIT4L are able to reduce cell proliferation and plasticity by inhibiting mTOR-mediated synthesis of proteins.

FKBP51 acts as a scaffolding protein decreasing v-akt thymoma viral proto-oncogene 1 functioning, resulting in decreased mTOR signaling and increased cell death (41, 42). Interestingly, FKBP51 is one of the cochaperones involved in the nuclear signaling of GR and plays a role in GR sensitivity and regulation of the hypothalamic-pituitary-adrenal axis. Polymorphisms in FKBP51 have been associated with differences in GR sensitivity and GC stress response (43–45). Variations in the gene have been associated with increased recurrence of depression and with rapid response to antidepressant treatment (46). In particular, alleles associated with enhanced expression of FKBP51 after GR activation may represent a risk factor for stress-related psychiatric disorders (43).

DDIT3 (or CCAAT-enhancer-binding proteins homologous protein 3 or CHOP3) is a proapoptotic transcription factor that responds to availability of key nutrients, such as amino acids, glucose, and lipids, and to endoplasmic reticulum stress. DDIT3 is regulated by the mTOR pathway as well as by the activating transcription factor family and affects the expression of cell survival and death pathways (47–49).

Here, we present data that imply a fundamental and essential role of GC in regulating the mTOR pathway in the hippocampus, by transcriptionally regulating several mTOR pathway members. The GC regulation of mTOR pathway members was more robust in the DG than in the CA3. The relative lack of GR expression in CA3 (50) may explain the difference in degree of GC regulation of the mTOR pathway between both subregions. However, differences in GR expression are only one of the many fundamental differences in molecular architecture between the different subregions of the hippocampus, as we and others have previously shown (34, 51–53).

## GC responsiveness of FKBP51 and DDIT4 occurs via GR binding to GRE

In line with our findings, DDIT4 and FKBP51 were previously reported to be GC responsive and to contain potential GREs in their vicinity (54, 55). DDIT4 was originally identified to be responsive to dexamethasone treatment in T-cell lymphoma cell lines and thymocytes (56). Because treatment of these cells with the GR antagonist RU486 inhibited the induction of DDIT4, regulation via GR seemed likely. Indeed, in a ChIP-sequencing study, in which A549 cells (human lung adenocarcinoma epithelial cell line) were screened for GR-binding sites after dexamethasone stimulation, DDIT4 was found to be a primary GR target (55). Analysis of the GR-binding region revealed a GRE-like sequence, which is identical to the region that we have previously identified (35). Here, we demonstrate that DDIT4 is a primary target of the GR in the rat hippocampus.

In case of FKBP51, GREs surrounding the gene have also been studied extensively in A549 cells (54). We recently predicted three evolutionary conserved GREs surrounding FKBP51 and showed that all three are bound by GR in the hippocampus (35). One of these (FKBP51\_3) is a previously undescribed GRE and might be a specific GR target *in vivo* in the brain. This is of particular interest, given that polymorphisms in FKBP51 have been implicated as risk factors for several stress-related brain disorders, such as depression and posttraumatic stress disorder (43, 57, 58).

## DDIT3 and DDIT4L are GC responsive but not GRE driven

DDIT3 and DDIT4L do not appear to be primary targets of GR in the rat brain, based on the fact that we did not find evidence of GR binding to the predicted GREs in the brain regions under the applied conditions. Consequently, we cannot fully exclude that these GREs might be bound by GR in a different time frame or in other tissues. However, given that both genes are down-regulated by GC in the DG, it seems more likely that they are regulated via the transrepression mode of action of GR, inhibiting the action of key transcription factors controlling DDIT3 and DDIT4L expression. Alternatively, they may be downstream secondary targets of GR, regulated by an intermediate GC-responsive transcription factor (59). DDIT3 is known to be a target of mTOR, but can also be regulated by the activating transcription factor family (52). Finally, a remote possibility is that the history of ADX has resulted in chromatin remodeling, shielding the GREs from GR binding. Chromatin remodeling has been postulated to occur as a consequence of GC pulsatility (60) and aberrant GC exposure (61).

## What is the consequence of mTOR regulation by GC for the hippocampus?

In this study, we found opposing effects of GC injections on expression levels of mTOR regulators in control animals, *i.e.* up-regulation of DDIT4 and FKBP51 but down-regulation of DDIT4L, making it hard to predict *a priori* what the overall effect on mTOR protein levels would be. The opposing effects on mTOR regulators identified in the current study may represent a mechanism by which GC can fine-tune the overall outcome on mTOR signaling (Fig. 5). A careful balance between mTOR inhibition and activation is essential to maintain neuronal health and function and prevent brain disease. For example, aberrant mTOR activation is a hallmark of brain tissue from rats with chronic seizures (62), but at the same time, mTOR is activated in the rat hippocampus during spatial learning (63) and is required for memory consolidation by controlling the increase of synaptic glutamate receptor 1 (64).

Despite the GC-induced changes in expression of mTOR regulators in the DG after an acute challenge with GC, no change in mTOR protein was observed in the hippocampus of control animals, suggesting that a change in expression of mTOR regulators may be necessary to maintain the mTOR balance in the hippocampus.

## Stress history changes GC responsiveness of the mTOR pathway

An interesting observation in this study is that chronic stress exposure had profound effects on the mTOR path-

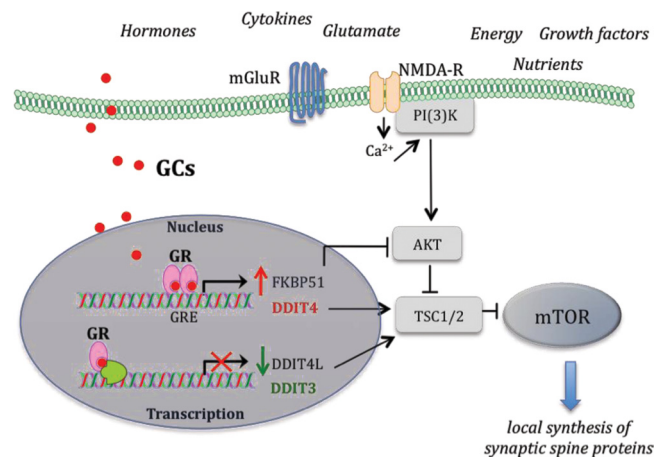

**FIG. 5.** Schematic overview of key components of the mTOR pathway and a number of its physiological and molecular regulators in the brain, indicating a role for GC. After GC binding to GR, FKBP51 and DDIT4 are up-regulated by a GRE-driven mechanism, whereas DDIT4L and DDIT3 are down-regulated via a non-GRE-driven mechanism. These mTOR regulators will influence the overall levels of mTOR, with consequences for local synthesis of synaptic spine proteins and thus for synaptic plasticity. PI3K, Phosphatidylinositol 3 kinase; AKT, v-akt thymoma viral protooncogene 1; NMDA-R, N-methyl-D-aspartate receptor; GluR, glutamate receptor; TSC1/2, tuberous sclerosis protein 1/2.

way. Chronic stress not only increased basal mTOR protein levels in the hippocampus but also abolished the GC responsiveness of DDIT4 and DDIT3 in the DG. Moreover, an acute GC challenge was associated with a significant reduction in hippocampal mTOR protein levels.

Chronic stress has well-described effects on hippocampal structure and function, *i.e.* dendritic remodeling in CA3 (4, 11–13) and suppression of apoptosis and neurogenesis in the DG (4, 10, 14). However, some of the changes in hippocampal function after chronic stress are not obvious under baseline conditions and only become apparent when GR is subsequently activated, such as the enhanced synaptic excitation of DG cells with respect to  $\alpha$ -amino-3-hydroxy-5-methyl-4-isoxazolepropionic acid (AMPA) receptor-mediated synaptic responses in the DG (15). Local chromatin remodeling differentially affecting the transcriptional potential of individual genes and consequently the altered response to a subsequent GR activation may underlie both the enhanced synaptic excitability as well as the changes in GC regulation of mTOR pathway members in the DG after chronic stress. Indeed, CRS was recently shown to affect histone methylation patterns, resulting in changes in chromatin structure and consequently changes in transcriptional potential (32). These findings may explain why the GC responsiveness of DDIT4, a primary GR target driven by a classical GRE, is lost after CRS. For DDIT3, the mechanism is less clear, because we do not know whether it is a primary GR target via transrepression, a secondary target via an intermediate GC-responsive transcription factor, or a target gene of the mTOR pathway that is indirectly affected by GC. Future studies are required to elucidate the precise mechanism.

We hypothesize a model in which acute and chronic stress have differential effects on mTOR signaling, with consequences for LTP, LTD, and other neuroplastic processes as well as for survival/resilience pathways. In our model, control animals have a healthy mTOR balance, leading to efficient LTP and neuroprotection, which is not compromised by exposure to an acute GC challenge. Our data show that in animals exposed to chronic stress, hippocampal mTOR levels are increased, whereas if these animals are subjected to an additional stressor in the form of an acute GC challenge, mTOR levels are decreased. We therefore speculate that exposure to chronic stress results in a more dynamic mTOR balance, making it difficult to maintain a healthy equilibrium upon subsequent challenge and tipping the mTOR signaling balance toward a decrease in LTP and an increase in cell death pathways. Whether the effects of chronic stress on the mTOR balance signify greater vulnerability to damage or better adaptation is unclear. Future studies are required to test this model.



Interestingly, activation of the mTOR signaling pathway in the prefrontal cortex was recently shown to underlie the antidepressant action of ketamine, a nonselective N-methyl-D-aspartate receptor antagonist (65). Fast activation of mTOR signaling by ketamine resulted in a rapid increase of synapse-associated proteins and spine number in the prefrontal cortex. Conversely, mTOR inhibition has been reported to have neuroprotective properties and to delay neurodegeneration (66, 67). GC may be important regulators of this delicate balance between mTOR activation and inhibition in the brain, with different effects depending on the context, timing, and exposure of neurons (68). An optimal balance of the mTOR pathway would promote LTP and memory formation, while at the same time promoting cell survival and resilience. Indeed, chronic stress exposure suppresses LTP in the DG (69–71) and enhances vulnerability of DG granule cells to cell death (72).

## Conclusion

The data presented here indicate that mTOR activity and the resulting translational processes it is involved in are regulated by GC in the rat brain. We show that GC regulate upstream mTOR regulators and that DDIT4 and FKBP51 are primary targets of GR in the hippocampus. Moreover, we demonstrate that the GC regulation of upstream mTOR regulators and downstream target DDIT3 differs between hippocampal subregions CA3 and DG, suggesting a key role of the mTOR pathway in the differential plasticity of these hippocampal subregions in response to acute GC exposure. Considering the fact that both GC and mTOR play an important role in neuroplasticity and neuronal survival (17, 19, 20), we propose that GC play an important role in regulating the mTOR balance in the brain. Because GC regulation of mTOR regulators and mTOR protein levels is affected by a history of chronic stress, it would be of interest to further examine how these regulators are implicated in the pathogenesis of stress-related mental disorders.

## Acknowledgments

We thank Maaïke van der Mark for her experimental assistance and Professor Melly Oitzl for assistance with the statistical analyses. We also thank Ana Maria Magarinos for providing the rat brain tissue for the microarray analysis.

Address all correspondence and requests for reprints to: Dr. N Nicole A. Datson, Leiden University Medical Centre,

Department of Human Genetics, P.O. Box 9600, 2300 LC Leiden, The Netherlands. E-mail: N.A.Datson@lumc.nl.

This work was supported by The Netherlands Organization for Scientific Research Grants 836.06.010 (MEERVOUD) (to N.A.D.), by TI Pharma T5-209, and by Human Frontier Science Program Grant RGP39. E.R.d.K. was supported by the Royal Netherlands Academy of Science.

Disclosure Summary: The authors have nothing to disclose.

## References

1. Pratt WB 1990 Glucocorticoid receptor structure and the initial events in signal transduction. *Prog Clin Biol Res* 322:119–132
2. Reul JM, de Kloet ER 1985 Two receptor systems for corticosterone in rat brain: microdistribution and differential occupation. *Endocrinology* 117:2505–2511
3. Johnson LR, Farb C, Morrison JH, McEwen BS, LeDoux JE 2005 Localization of glucocorticoid receptors at postsynaptic membranes in the lateral amygdala. *Neuroscience* 136:289–299
4. Magariños AM, McEwen BS, Flügge G, Fuchs E 1996 Chronic psychosocial stress causes apical dendritic atrophy of hippocampal CA3 pyramidal neurons in subordinate tree shrews. *J Neurosci* 16:3534–3540
5. Tsolakidou A, Trümbach D, Panhuysen M, Pütz B, Deussing J, Wurst W, Sillaber I, Holsboer F, Rein T 2008 Acute stress regulation of neuroplasticity genes in mouse hippocampus CA3 area—possible novel signalling pathways. *Mol Cell Neurosci* 38:444–452
6. Howland JG, Wang YT 2008 Synaptic plasticity in learning and memory: stress effects in the hippocampus. *Prog Brain Res* 169:145–158
7. Kim JJ, Song EY, Kosten TA 2006 Stress effects in the hippocampus: synaptic plasticity and memory. *Stress* 9:1–11
8. Joëls M, Velzing E, Nair S, Verkuyl JM, Karst H 2003 Acute stress increases calcium current amplitude in rat hippocampus: temporal changes in physiology and gene expression. *Eur J Neurosci* 18:1315–1324
9. van Gemert NG, Carvalho DM, Karst H, van der Laan S, Zhang M, Meijer OC, Hell JW, Joëls M 2009 Dissociation between rat hippocampal CA1 and dentate gyrus cells in their response to corticosterone: effects on calcium channel protein and current. *Endocrinology* 150:4615–4624
10. Heine VM, Maslam S, Zareno J, Joëls M, Lucassen PJ 2004 Suppressed proliferation and apoptotic changes in the rat dentate gyrus after acute and chronic stress are reversible. *Eur J Neurosci* 19:131–144
11. Sousa N, Lukoyanov NV, Madeira MD, Almeida OF, Paula-Barbosa MM 2000 Reorganization of the morphology of hippocampal neurites and synapses after stress-induced damage correlates with behavioral improvement. *Neuroscience* 97:253–266
12. Vyas A, Mitra R, Shankaranarayana Rao BS, Chattarji S 2002 Chronic stress induces contrasting patterns of dendritic remodeling in hippocampal and amygdaloid neurons. *J Neurosci* 22:6810–6818
13. Watanabe Y, Gould E, McEwen BS 1992 Stress induces atrophy of apical dendrites of hippocampal CA3 pyramidal neurons. *Brain Res* 588:341–345
14. Gould E, McEwen BS, Tanapat P, Galea LA, Fuchs E 1997 Neurogenesis in the dentate gyrus of the adult tree shrew is regulated by psychosocial stress and NMDA receptor activation. *J Neurosci* 17:2492–2498
15. Karst H, Joëls M 2003 Effect of chronic stress on synaptic currents in rat hippocampal dentate gyrus neurons. *J Neurophysiol* 89:625–633

16. Hoeffer CA, Klann E 2010 mTOR signaling: at the crossroads of plasticity, memory and disease. *Trends Neurosci* 33:67–75
17. Swiech L, Perycz M, Malik A, Jaworski J 2008 Role of mTOR in physiology and pathology of the nervous system. *Biochim Biophys Acta* 1784:116–132
18. Wu P, Jiang C, Shen Q, Hu Y 2009 Systematic gene expression profile of hypothalamus in calorie-restricted mice implicates the involvement of mTOR signaling in neuroprotective activity. *Mech Ageing Dev* 130:602–610
19. Bekinschtein P, Katze C, Slipczuk LN, Igaz LM, Cammarota M, Izquierdo I, Medina JH 2007 mTOR signaling in the hippocampus is necessary for memory formation. *Neurobiol Learn Mem* 87:303–307
20. Tang SJ, Reis G, Kang H, Gingras AC, Sonenberg N, Schuman EM 2002 A rapamycin-sensitive signaling pathway contributes to long-term synaptic plasticity in the hippocampus. *Proc Natl Acad Sci USA* 99:467–472
21. Bourgeron T 2009 A synaptic trek to autism. *Curr Opin Neurobiol* 19:231–234
22. Mozaffari M, Hoogeveen-Westerveld M, Kwiatkowski D, Sampson J, Ekong R, Povey S, den Dunnen JT, van den Ouweland A, Halley D, Nellist M 2009 Identification of a region required for TSC1 stability by functional analysis of TSC1 missense mutations found in individuals with tuberous sclerosis complex. *BMC Med Genet* 10:88
23. Akhavan D, Cloughesy TF, Mischel PS 2010 mTOR signaling in glioblastoma: lessons learned from bench to bedside. *Neuro Oncol* 12:882–889
24. Malagelada C, Jin ZH, Greene LA 2008 RTP801 is induced in Parkinson's disease and mediates neuron death by inhibiting Akt phosphorylation/activation. *J Neurosci* 28:14363–14371
25. Pei JJ, Hugon J 2008 mTOR-dependent signalling in Alzheimer's disease. *J Cell Mol Med* 12:2525–2532
26. Williams A, Sarkar S, Cuddon P, Ttofi EK, Saiki S, Siddiqi FH, Jahreiss L, Fleming A, Pask D, Goldsmith P, O'Kane CJ, Floto RA, Rubinsztein DC 2008 Novel targets for Huntington's disease in an mTOR-independent autophagy pathway. *Nat Chem Biol* 4:295–305
27. Shah OJ, Anthony JC, Kimball SR, Jefferson LS 2000 Glucocorticoids oppose translational control by leucine in skeletal muscle. *Am J Physiol Endocrinol Metab* 279:E1185–E1190
28. Shah OJ, Kimball SR, Jefferson LS 2000 Acute attenuation of translation initiation and protein synthesis by glucocorticoids in skeletal muscle. *Am J Physiol Endocrinol Metab* 278:E76–E82
29. Wang H, Kubica N, Ellisen LW, Jefferson LS, Kimball SR 2006 Dexamethasone represses signaling through the mammalian target of rapamycin in muscle cells by enhancing expression of REDD1. *J Biol Chem* 281:39128–39134
30. Howell KR, Kutuyanawalla A, Pillai A 2011 Long-term continuous corticosterone treatment decreases VEGF receptor-2 expression in frontal cortex. *PLoS One* 6:e20198
31. Shimizu H, Arima H, Ozawa Y, Watanabe M, Banno R, Sugimura Y, Ozaki N, Nagasaki H, Oiso Y 2010 Glucocorticoids increase NPY gene expression in the arcuate nucleus by inhibiting mTOR signaling in rat hypothalamic organotypic cultures. *Peptides* 31:145–149
32. Hunter RG, McCarthy KJ, Milne TA, Pfaff DW, McEwen BS 2009 Regulation of hippocampal H3 histone methylation by acute and chronic stress. *Proc Natl Acad Sci USA* 106:20912–20917
33. Sarabdjitsingh RA, Isenia S, Polman A, Mijalkovic J, Lachize S, Datson N, de Kloet ER, Meijer OC 2010 Disrupted corticosterone pulsatile patterns attenuate responsiveness to glucocorticoid signaling in rat brain. *Endocrinology* 151:1177–1186
34. Datson NA, Meijer L, Steenbergen PJ, Morsink MC, van der Laan S, Meijer OC, de Kloet ER 2004 Expression profiling in laser-microdissected hippocampal subregions in rat brain reveals large sub-region-specific differences in expression. *Eur J Neurosci* 20:2541–2554
35. Simon R, Lam A, Li MC, Ngan M, Menenzes S, Zhao Y 2007 Analysis of gene expression data using BRB-array tools. *Cancer Inform* 3:11–17
36. Smyth GK 2005 Limma: linear models for microarray data. In: Gentleman R, Carey V, Dudoit S, Irizarry R, Huber W, eds. *Bioinformatics and computational biology solutions using R and bioconductor*. New York: Springer; 397–420
37. Kelly EJ, Sandgren EP, Brinster RL, Palmiter RD 1997 A pair of adjacent glucocorticoid response elements regulate expression of two mouse metallothionein genes. *Proc Natl Acad Sci USA* 94:10045–10050
38. Yan H, Frost P, Shi Y, Hoang B, Sharma S, Fisher M, Gera J, Lichtenstein A 2006 Mechanism by which mammalian target of rapamycin inhibitors sensitize multiple myeloma cells to dexamethasone-induced apoptosis. *Cancer Res* 66:2305–2313
39. Corradetti MN, Inoki K, Guan KL 2005 The stress-induced proteins RTP801 and RTP801L are negative regulators of the mammalian target of rapamycin pathway. *J Biol Chem* 280:9769–9772
40. Ellisen LW, Ramsayer KD, Johannessen CM, Yang A, Beppu H, Minda K, Oliner JD, McKeon F, Haber DA 2002 REDD1, a developmentally regulated transcriptional target of p63 and p53, links p63 to regulation of reactive oxygen species. *Mol Cell* 10:995–1005
41. Pei H, Li L, Fridley BL, Jenkins GD, Kalari KR, Lingle W, Petersen G, Lou Z, Wang L 2009 FKBP51 affects cancer cell response to chemotherapy by negatively regulating Akt. *Cancer Cell* 16:259–266
42. Pei H, Lou Z, Wang L 2010 Emerging role of FKBP51 in AKT kinase/protein kinase B signaling. *Cell Cycle* 9:6–7
43. Binder EB 2009 The role of FKBP5, a co-chaperone of the glucocorticoid receptor in the pathogenesis and therapy of affective and anxiety disorders. *Psychoneuroendocrinology* 34(Suppl 1):S186–S195
44. Schiene-Fischer C, Yu C 2001 Receptor accessory folding helper enzymes: the functional role of peptidyl prolyl cis/trans isomerases. *FEBS Lett* 495:1–6
45. Vermeer H, Hendriks-Stegeman BI, van der Burg B, van Buul-Offers SC, Jansen M 2003 Glucocorticoid-induced increase in lymphocytic FKBP51 messenger ribonucleic acid expression: a potential marker for glucocorticoid sensitivity, potency, and bioavailability. *J Clin Endocrinol Metab* 88:277–284
46. Binder EB, Salyakina D, Lichtner P, Wochnik GM, Ising M, Pütz B, Papiol S, Seaman S, Lucae S, Kohli MA, Nickel T, Künzel HE, Fuchs B, Majer M, Pfennig A, Kern N, Brunner J, Modell S, Baghai T, Deiml T, Zill P, Bondy B, Rupprecht R, Messer T, Köhnele O, Dabitz H, Brückl T, Müller N, Pfister H, Lieb R, Mueller JC, Löhmussaar E, Strom TM, Bettecken T, Meitinger T, Uhr M, Rein T, Holsboer F, Müller-Miyhok B 2004 Polymorphisms in FKBP5 are associated with increased recurrence of depressive episodes and rapid response to antidepressant treatment. *Nat Genet* 36:1319–1325
47. Di Nardo A, Kramvis I, Cho N, Sadowski A, Meikle L, Kwiatkowski DJ, Sahin M 2009 Tuberous sclerosis complex activity is required to control neuronal stress responses in an mTOR-dependent manner. *J Neurosci* 29:5926–5937
48. Chen YJ, Tan BC, Cheng YY, Chen JS, Lee SC 2010 Differential regulation of CHOP translation by phosphorylated eIF4E under stress conditions. *Nucleic Acids Res* 38:764–777
49. Oyadomari S, Mori M 2004 Roles of CHOP/GADD153 in endoplasmic reticulum stress. *Cell Death Differ* 11:381–389
50. van Eekelen JA, Kiss JZ, Westphal HM, de Kloet ER 1987 Immunocytochemical study on the intracellular localization of the type 2 glucocorticoid receptor in the rat brain. *Brain Res* 436:120–128
51. Datson NA, Morsink MC, Meijer OC, de Kloet ER 2008 Central corticosteroid actions: search for gene targets. *Eur J Pharmacol* 583:272–289
52. Lein ES, Zhao X, Gage FH 2004 Defining a molecular atlas of the

- hippocampus using DNA microarrays and high-throughput in situ hybridization. *J Neurosci* 24:3879–3889
53. Greene JG, Borges K, Dingledine R 2009 Quantitative transcriptional neuroanatomy of the rat hippocampus: evidence for wide-ranging, pathway-specific heterogeneity among three principal cell layers. *Hippocampus* 19:253–264
  54. Paakinaho V, Makkonen H, Jääskeläinen T, Palvimo JJ 2010 Glucocorticoid receptor activates poised FKBP51 locus through long-distance interactions. *Mol Endocrinol* 24:511–525
  55. So AY, Chaivorapol C, Bolton EC, Li H, Yamamoto KR 2007 Determinants of cell- and gene-specific transcriptional regulation by the glucocorticoid receptor. *PLoS Genet* 3:e94
  56. Wang Z, Malone MH, Thomenius MJ, Zhong F, Xu F, Distelhorst CW 2003 Dexamethasone-induced gene 2 (dig2) is a novel pro-survival stress gene induced rapidly by diverse apoptotic signals. *J Biol Chem* 278:27053–27058
  57. Gillespie CF, Phifer J, Bradley B, Ressler KJ 2009 Risk and resilience: genetic and environmental influences on development of the stress response. *Depress Anxiety* 26:984–992
  58. Yehuda R, Cai G, Golier JA, Sarapas C, Galea S, Ising M, Rein T, Schmeidler J, Müller-Myhsok B, Holsboer F, Buxbaum JD 2009 Gene expression patterns associated with posttraumatic stress disorder following exposure to the World Trade Center attacks. *Biol Psychiatry* 66:708–711
  59. Morsink MC, Joëls M, Sarabdjitsingh RA, Meijer OC, De Kloet ER, Datson NA 2006 The dynamic pattern of glucocorticoid receptor-mediated transcriptional responses in neuronal PC12 cells. *J Neurochem* 99:1282–1298
  60. Conway-Campbell BL, Pooley JR, Hager GL, Lightman SL 2012 Molecular dynamics of ultradian glucocorticoid receptor action. *Mol Cell Endocrinol* 348:383–393
  61. Zhang L, Li H, Hu X, Li XX, Smerin S, Ursano R 2011 Glucocorticoid-induced p11 over-expression and chromatin remodeling: a novel molecular mechanism of traumatic stress? *Med Hypotheses* 76:774–777
  62. Huang X, Zhang H, Yang J, Wu J, McMahon J, Lin Y, Cao Z, Gruenthal M, Huang Y 2010 Pharmacological inhibition of the mammalian target of rapamycin pathway suppresses acquired epilepsy. *Neurobiol Dis* 40:193–199
  63. Qi S, Mizuno M, Yonezawa K, Nawa H, Takei N 2010 Activation of mammalian target of rapamycin signaling in spatial learning. *Neurosci Res* 68:88–93
  64. Slipczuk L, Bekinschtein P, Kathe C, Cammarota M, Izquierdo I, Medina JH 2009 BDNF activates mTOR to regulate GluR1 expression required for memory formation. *PLoS One* 4:e6007
  65. Li N, Lee B, Liu RJ, Banasr M, Dwyer JM, Iwata M, Li XY, Aghajanian G, Duman RS 2010 mTOR-dependent synapse formation underlies the rapid antidepressant effects of NMDA antagonists. *Science* 329:959–964
  66. Choi KC, Kim SH, Ha JY, Kim ST, Son JH 2010 A novel mTOR activating protein protects dopamine neurons against oxidative stress by repressing autophagy related cell death. *J Neurochem* 112:366–376
  67. Spilman P, Podlitskaya N, Hart MJ, Debnath J, Gorostiza O, Breiden D, Richardson A, Strong R, Galvan V 2010 Inhibition of mTOR by rapamycin abolishes cognitive deficits and reduces amyloid- $\beta$  levels in a mouse model of Alzheimer's disease. *PLoS One* 5:e9979
  68. Du J, Wang Y, Hunter R, Wei Y, Blumenthal R, Falke C, Khairova R, Zhou R, Yuan P, Machado-Vieira R, McEwen BS, Manji HK 2009 Dynamic regulation of mitochondrial function by glucocorticoids. *Proc Natl Acad Sci USA* 106:3543–3548
  69. Alfarez DN, Joëls M, Krugers HJ 2003 Chronic unpredictable stress impairs long-term potentiation in rat hippocampal CA1 area and dentate gyrus in vitro. *Eur J Neurosci* 17:1928–1934
  70. Bodnoff SR, Humphreys AG, Lehman JC, Diamond DM, Rose GM, Meaney MJ 1995 Enduring effects of chronic corticosterone treatment on spatial learning, synaptic plasticity, and hippocampal neuropathology in young and mid-aged rats. *J Neurosci* 15:61–69
  71. Krugers HJ, Goltstein PM, van der Linden S, Joëls M 2006 Blockade of glucocorticoid receptors rapidly restores hippocampal CA1 synaptic plasticity after exposure to chronic stress. *Eur J Neurosci* 23:3051–3055
  72. van Gemert NG, Joëls M 2006 Effect of chronic stress and mifepristone treatment on voltage-dependent  $Ca^{2+}$  currents in rat hippocampal dentate gyrus. *J Neuroendocrinol* 18:732–741
